# Supplementary material for: Pharmacokinetics and Pharmacodynamics of Meloxicam in East Asian Populations: The Role of Ethnicity on Drug Response
Source: PubMed Central journal article supplement — CPT Pharmacometrics Syst Pharmacol. 2017 Nov 23;6(12):823–32. doi: 10.1002/psp4.12259 (PMC5744175; doi:10.1002/psp4.12259), 2017-11-23

## Supplementary Figure S1. Goodness-of-Fit Plots of Final Population Pharmacokinetic Model.

(a) and (b), observed concentrations vs. population and individual predictions, respectively. (c), conditional weighted residuals (CWRES) vs. time. (d), absolute individual weighted residuals (IWRES) vs. individual predictions.

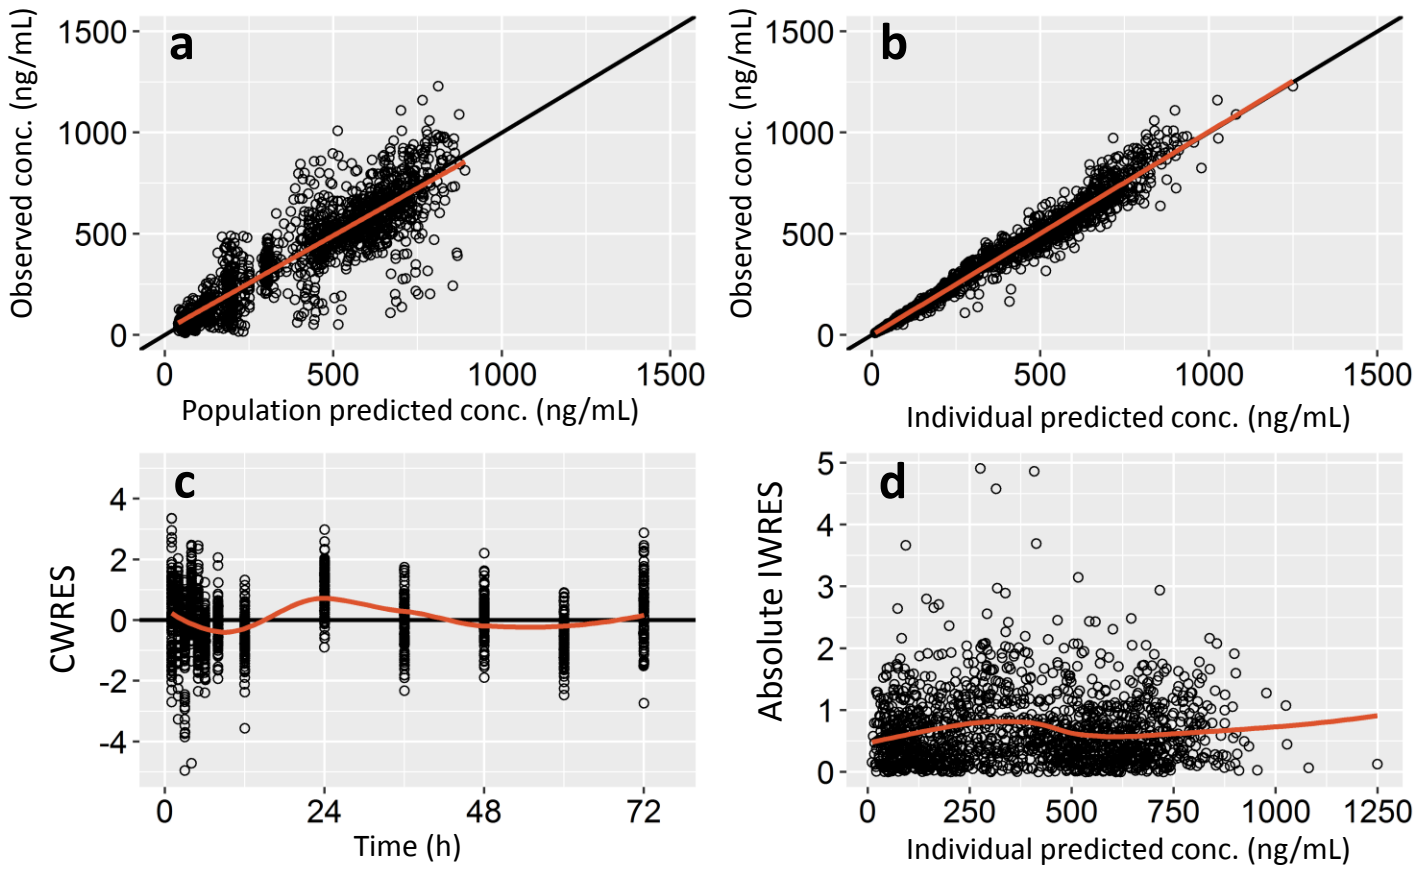

Supplement: PSP4-6-823-s003.pdf [file PSP4-6-823-s003.pdf]
