# Supplementary material for: Pharmacokinetics and Pharmacodynamics of Meloxicam in East Asian Populations: The Role of Ethnicity on Drug Response
Source: PubMed Central journal article supplement — CPT Pharmacometrics Syst Pharmacol. 2017 Nov 23;6(12):823–32. doi: 10.1002/psp4.12259 (PMC5744175; doi:10.1002/psp4.12259), 2017-11-23

**Supplementary Figure S2. Prediction-corrected Visual Predictive Check and Comparison of Simulated Meloxicam Concentration to Previously Reported Data from Single-dose and Multiple-dose Studies.**

(a) Prediction-corrected visual predictive check for the final model. The red line at the center represents median observed concentrations and the dotted red lines represents 5th and 95th percentiles for observations. Red areas represent 95% confidence intervals for the 50th percentile prediction interval and blue areas represent those for the 5th and 95th percentile prediction intervals. (b and c) Comparisons of simulated meloxicam concentrations with previously reported data from single-dose and multiple-dose studies, respectively<sup>14,33</sup>. Open circles and black lines represent reported mean concentrations, and vertical bars indicate standard deviations. Gray lines represent simulated mean concentrations and gray dotted lines represent standard deviations.

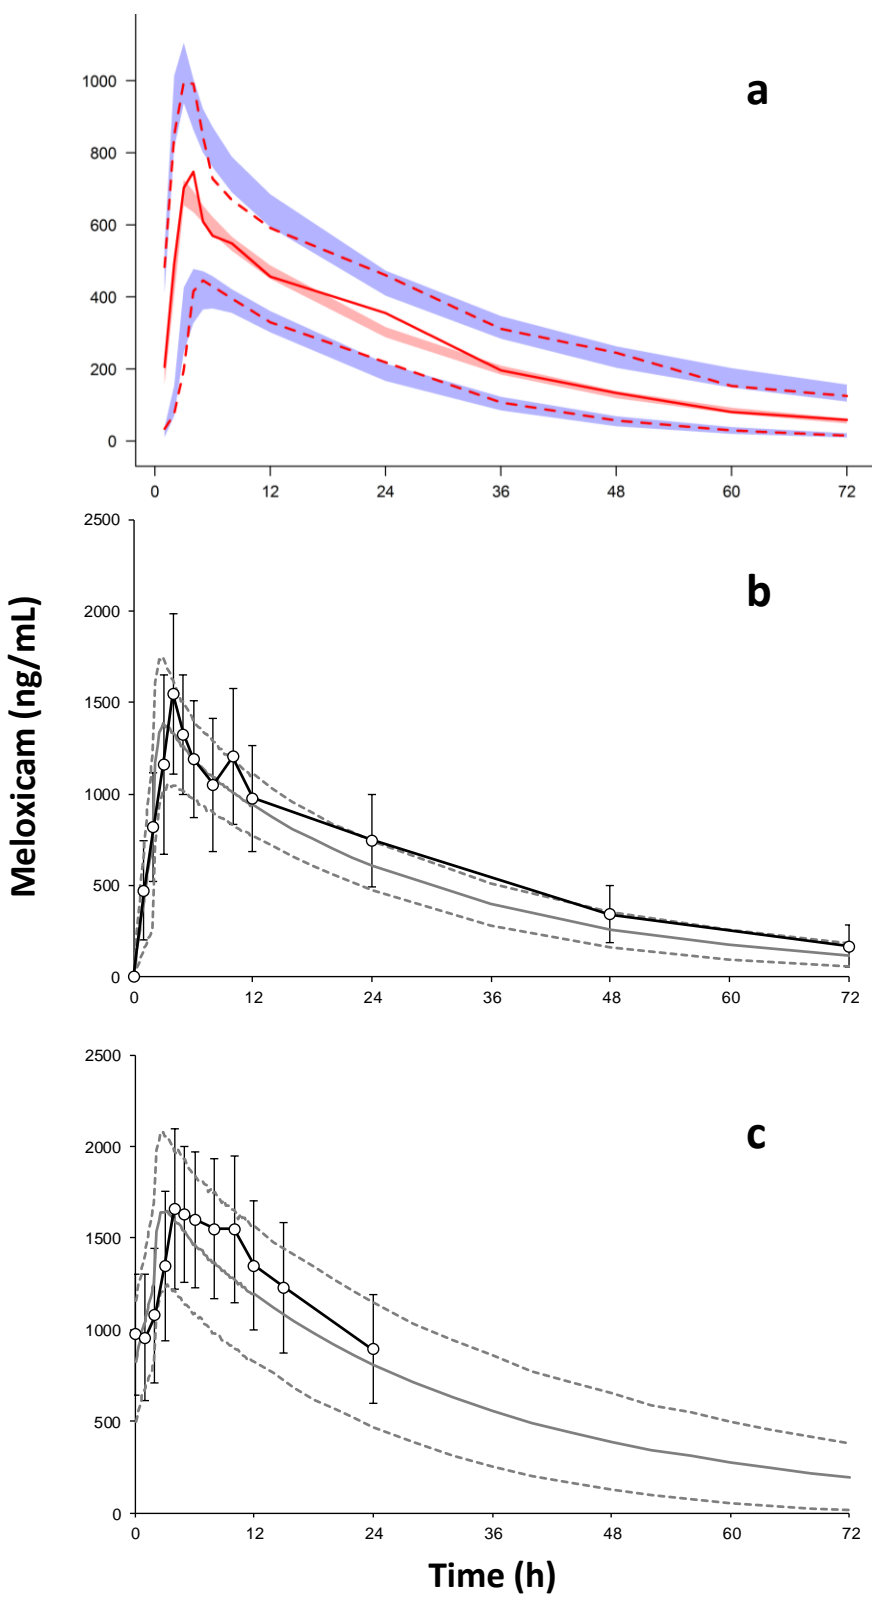

Supplement: PSP4-6-823-s004.pdf [file PSP4-6-823-s004.pdf]
