# Supplementary material for: Pharmacokinetics and Pharmacodynamics of Meloxicam in East Asian Populations: The Role of Ethnicity on Drug Response
Source: PubMed Central journal article supplement — CPT Pharmacometrics Syst Pharmacol. 2017 Nov 23;6(12):823–32. doi: 10.1002/psp4.12259 (PMC5744175; doi:10.1002/psp4.12259), 2017-11-23

### Supplementary Figure S3. Prediction-corrected Visual Predictive Check Stratified by Ethnicity

Prediction-corrected visual predictive check for the final model; the red lines at the center represent the median concentrations observed and the dotted red lines represent the 5th and 95th percentiles for observations. The red areas represent the 95% confidence interval for the 50th percentiles prediction interval and the blue areas represent those for the 5th and 95th percentiles prediction intervals.

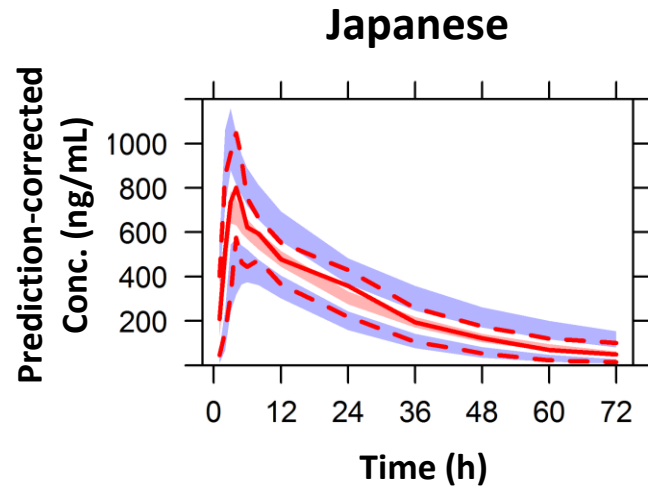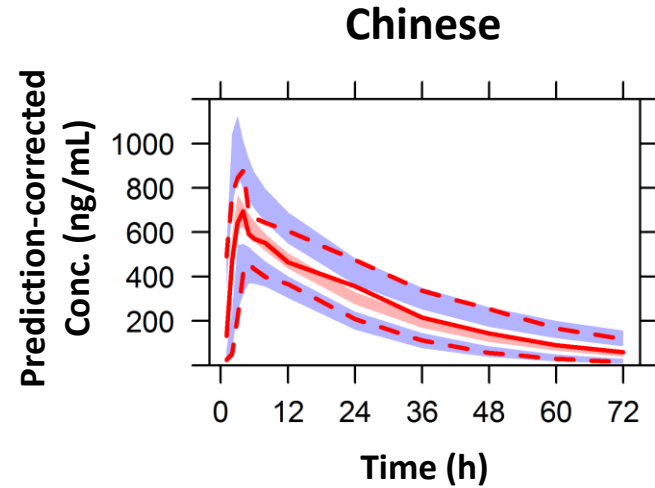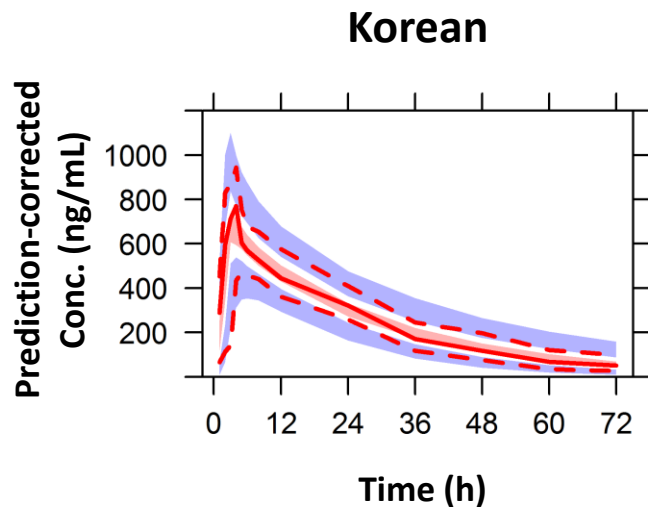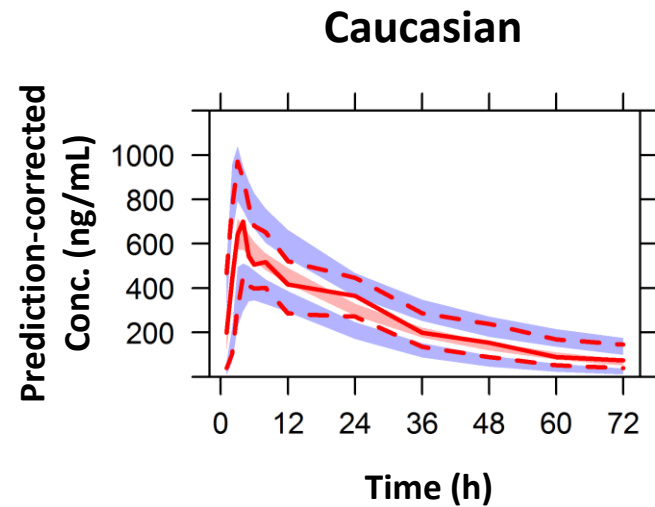

Supplement: PSP4-6-823-s005.pdf [file PSP4-6-823-s005.pdf]
