# Supplementary material for: Pharmacokinetics and Pharmacodynamics of Meloxicam in East Asian Populations: The Role of Ethnicity on Drug Response
Source: PubMed Central journal article supplement — CPT Pharmacometrics Syst Pharmacol. 2017 Nov 23;6(12):823–32. doi: 10.1002/psp4.12259 (PMC5744175; doi:10.1002/psp4.12259), 2017-11-23

## Supplementary Figure S4. Prediction-corrected Visual Predictive Check Stratified by *CYP2C9* Genotype

Prediction-corrected visual predictive check for the final model; the red lines at the center represent median observed concentrations and the dotted red lines represent 5th and 95th percentiles of observations. Red areas represent 95% confidence intervals for 50th percentiles of prediction intervals and blue areas represent those for 5th and 95th percentiles of prediction intervals.

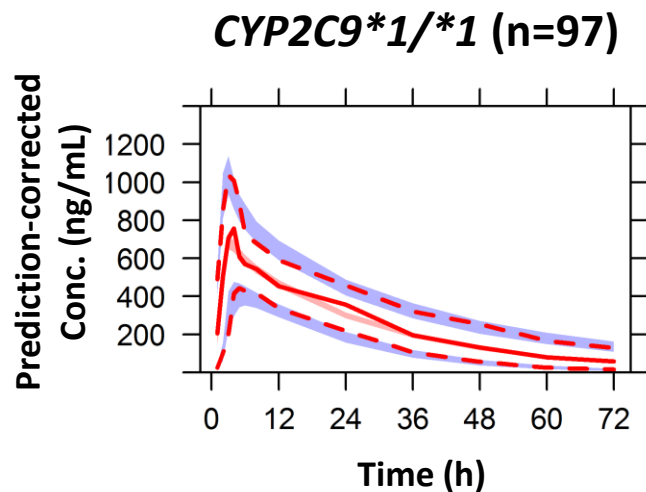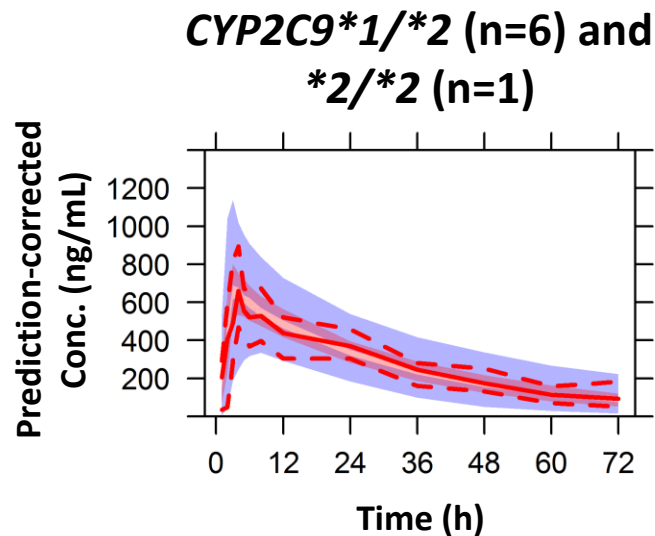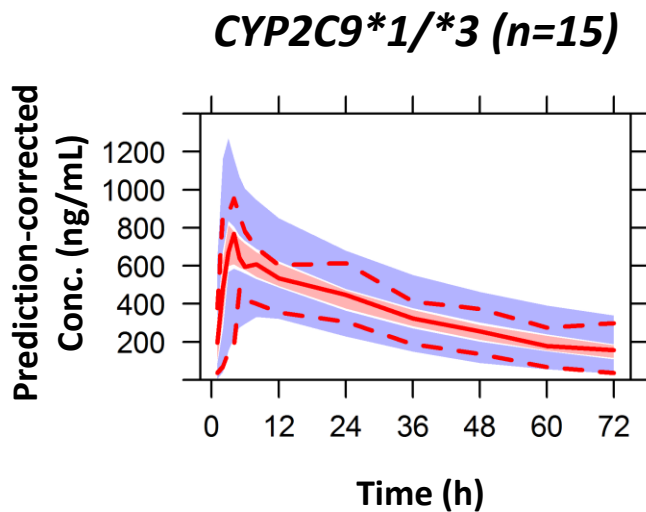

Supplement: PSP4-6-823-s006.pdf [file PSP4-6-823-s006.pdf]
